# Supplementary material for: Psychotherapists’ Reports regarding the Impact of the COVID-19 Pandemic on Their Patients: A Cross-National Descriptive Study Based on the Social-Ecological Model (SEM)
Source: MDPI journal article supplement (doi:10.3390/ijerph19116825), 2022-06-02
Supplement: s1 [file s1]

Comprehensive tables by country with word stems with more than 5% frequency in the responses. In total, 1885 psychotherapists participated. Out of this, 1690 gave answers to our question.

#### *Austria (A)*

**Table S1** Word stems in psychotherapists' (n=1377) articulations of how COVID-19 was addressed in psychotherapy sessions with a frequency of more than 5% in Austria.

| <i>German word stem</i> | <i>n</i> | <i>%</i> | <i>English equivalent</i>             |
|-------------------------|----------|----------|---------------------------------------|
| angst / ängst           | 392      | 28.5     | fear, anxiety (anxieties, anxious...) |
| sorge                   | 282      | 20.5     | worry, worries                        |
| schränk                 | 175      | 12.7     | restriction(s), limitation(s), -ing   |
| (un-)sicher             | 123      | 8.9      | (un-)safe, (un-)secure, (un-)certain  |
| leben                   | 122      | 8.9      | life, living                          |
| änder                   | 109      | 7.9      | change(s)                             |
| über                    | 101      | 7.3      | about, over                           |
| situation               | 100      | 7.3      | situation                             |
| tag                     | 100      | 7.3      | day                                   |
| isol                    | 96       | 7.0      | isolation                             |
| belast                  | 93       | 6.8      | burden(ed), strain(ed)                |
| zukunft                 | 86       | 6.2      | future                                |
| auswirk                 | 84       | 6.1      | effect                                |
| exist                   | 81       | 5.9      | existence, existing                   |
| famili                  | 80       | 5.8      | family, -ar, -ies                     |
| alltag                  | 77       | 5.6      | daily routine, everyday life          |
| einsam                  | 73       | 5.3      | lonely, solitary                      |
| perso / ö               | 70       | 5.1      | person, personal                      |

#### *Germany (DE)*

**Table S2** Word stems in psychotherapists' (n=120) articulations of how COVID-19 was addressed in psychotherapy sessions with a frequency of more than 5% in Germany.

| <i>German word stem</i> | <i>n</i> | <i>%</i> | <i>English equivalent</i>             |
|-------------------------|----------|----------|---------------------------------------|
| angst / ängst           | 50       | 41.7     | fear, anxiety (anxieties, anxious...) |
| schränk                 | 30       | 25.0     | restriction(s), limitation(s), -ing   |
| sorge                   | 23       | 19.2     | worry, worries                        |
| schul / school          | 23       | 19.2     | school                                |
| belast                  | 20       | 16.7     | burden(ed), strain(ed)                |
| kontakt                 | 12       | 10.0     | contact                               |
| soziale                 | 11       | 9.2      | social                                |
| änder                   | 10       | 8.3      | change(s)                             |
| fehlende                | 9        | 7.5      | missing, absent                       |
| über                    | 9        | 7.5      | about, over                           |

|          |   |     |                              |
|----------|---|-----|------------------------------|
| alltag   | 8 | 6.7 | daily routine, everyday life |
| stress   | 8 | 6.7 | stress                       |
| famili   | 8 | 6.7 | family, -ar, -ies            |
| unsicher | 8 | 6.7 | uncertain                    |
| leben    | 7 | 5.8 | life, living                 |
| frage    | 7 | 5.8 | question, questioning        |
| kind     | 7 | 5.8 | child(ren)                   |

### *Czechia (CZ)*

**Table S3** Word stems in psychotherapists' (n=104) articulations of how COVID-19 was addressed in psychotherapy sessions with a frequency of more than 5% in Czechia.

| <i>Czech word stem</i> | <i>n</i> | <i>%</i> | <i>English equivalent</i>           |
|------------------------|----------|----------|-------------------------------------|
| obav                   | 38       | 36.5     | worry, worries                      |
| strach                 | 25       | 24.0     | fear                                |
| úzkost                 | 25       | 24.0     | anxiety (anxieties, anxious...)     |
| nejisto                | 21       | 20.2     | uncertainty, -ies                   |
| rodi                   | 20       | 19.2     | family, -ar, -ies, inkl. parent(s)  |
| omez                   | 19       | 18.3     | restriction(s), limitation(s), -ing |
| život                  | 17       | 16.3     | life                                |
| blízk                  | 14       | 13.5     | close, -ness                        |
| změn                   | 14       | 13.5     | change(s)                           |
| prac+prac              | 13       | 12.5     | work, job                           |
| izolac                 | 12       | 11.5     | isolation                           |
| opatření               | 10       | 9.6      | measure(s)                          |
| tíž                    | 10       | 9.6      | difficulty, -ies, trouble(s)        |
| zdrav                  | 10       | 9.6      | health                              |
| budoucnost             | 9        | 8.7      | future                              |
| dět                    | 9        | 8.7      | children                            |
| finan                  | 9        | 8.7      | finance, -ial                       |
| karant                 | 8        | 7.7      | quarantine                          |
| situac                 | 8        | 7.7      | situation, -al                      |
| ztrát                  | 8        | 7.7      | loss                                |
| dopad                  | 7        | 6.7      | impact                              |
| možnost                | 7        | 6.7      | (im)possibility, only once positive |
| partner                | 7        | 6.7      | partner                             |
| téma                   | 7        | 6.7      | theme, topic                        |
| vztah                  | 7        | 6.7      | relationship                        |
| dom                    | 6        | 5.8      | home, domestic, house(hold)         |
| lid                    | 6        | 5.8      | human(s), people                    |
| nov                    | 6        | 5.8      | new                                 |
| osob                   | 6        | 5.8      | person(al)                          |
| poci                   | 6        | 5.8      | feel                                |

**Table S4.** Word stems in psychotherapists' (n=89) articulations of how COVID-19 was addressed in sessions of psychotherapy with a frequency of more than 5% in Slovakia.

| <i><b>Slovak word stem</b></i> | <i><b>n</b></i> | <i><b>%</b></i> | <i><b>English equivalent</b></i>    |
|--------------------------------|-----------------|-----------------|-------------------------------------|
| strach                         | 22              | 24.7            | fear                                |
| úzkos                          | 21              | 23.6            | anxiety (anxieties, anxious...)     |
| obav                           | 18              | 20.2            | worry, worries                      |
| rodi                           | 17              | 19.1            | family, -ar, -ies, inkl. parent(s)  |
| neistot                        | 15              | 16.9            | uncertainty, -ies                   |
| obmedz                         | 15              | 16.9            | restriction(s), limitation(s), -ing |
| izol                           | 12              | 13.5            | isolation                           |
| život                          | 12              | 13.5            | life                                |
| prác                           | 12              | 13.5            | work, job                           |
| strat                          | 11              | 12.4            | loss                                |
| zmen                           | 11              | 12.4            | change(s)                           |
| soc                            | 11              | 12.4            | social                              |
| tém                            | 10              | 11.2            | theme, topic                        |
| kontakt                        | 10              | 11.2            | contact                             |
| det                            | 8               | 9.0             | child(ren)                          |
| zdrav                          | 7               | 7.9             | health                              |
| blízk                          | 7               | 7.9             | close, -ness                        |
| finan                          | 7               | 7.9             | finance, -ial                       |
| chor                           | 6               | 6.7             | ill / sick -ness                    |
| karant                         | 6               | 6.7             | quarantine                          |
| probl                          | 6               | 6.7             | problem -atic                       |
| dom                            | 6               | 6.7             | home, domestic, house(hold)         |
| t'až                           | 6               | 6.7             | difficulty, -ies, trouble(s)        |
| starost                        | 6               | 6.7             | concern(s)                          |
| opatren                        | 5               | 5.6             | measure(s)                          |
| možnos                         | 5               | 5.6             | (im)possibility                     |
| situac                         | 5               | 5.6             | situation                           |
| spojen                         | 5               | 5.6             | connected                           |
| vzt'ah                         | 5               | 5.6             | relationship                        |
